# Supplementary material for: Strategic discrimination and the emergence of systematic exclusion
Source: Springer Nature journal article supplement (doi:10.1007/s00181-023-02487-7), 2023-09-28
Supplement: MOESM1 [file 26102190]

### Online Appendix. Experimental Instructions

**General Instructions**[all participants]

**Welcome to today’s experiment and thank you for your participation**

Dear participant,

This experiment takes about 45 minutes to complete. Please read the following instructions carefully. If you have any questions during the experiment, please raise your hand. We will come to your cubical and answer your question.

This experiment consists of three parts and a questionnaire at the end of the experiment that covers different topics. You will receive the instructions for each part before it starts. You will then answer questions and make various decisions. During this economic experiment, you **will earn payoffs depending on your decisions** during the experiment. Some of **your decisions have** **real consequences on other participants** within this experiment.

At the end of the experiment one out of the three parts will be randomly selected for payment. The payoffs from the entire experiment will be solely dependent on the decisions you and other participants made in this part. During the experiment you will receive Taler.

1 Taler is worth €0.05.

At the end of the experiment, all Talers will be converted into Euros. In addition to the payoffs you earn in this experiment, you will receive an attendance fee of 4€ for participating in the experiment regardless of your decisions. You will be paid your attendance fee and the payoffs you earned in the experiment at the end of the experiment in private and in cash. No other team member will know how much you have earned in the experiment. This procedure guarantees that we can ensure the anonymity of your decisions and that other participants will be unable to identify you.

You are not allowed to communicate with each other during the experiment. Violating this rule will lead to your exclusion from the experiment. In this case, you will receive no payoffs and no attendance fee.

Click on “continue” when you have read and understood these instructions.

**Altruistic Selection (AS) Treatment**

**Project Stage Instructions** [all participants]

This part of the experiment consists of two stages; the team formation stage and the project stage, in which the final payoffs from this part of the experiments are determined. In the team formation phase, three of the four team members are going to build a team. Participant A and Participant B are already part of the team. One further participant (either C or D) will be selected as the third team member in the team formation stage.

You are participant A [B; C or D].

The three participants will later have the opportunity to increase their payoffs. The fourth participant, who is not part of the team, will get no additional payoffs from this part of the experiment. We are first going to explain in detail how the team members are selected, and we will explain how the payoffs are determined in this part of the experiment.

**Determination of payoffs**

Every team member receives 100 Talers.
The fourth participant –who is not part of the team– receives 0 Talers.

**Team Formation Stage Instructions** [all participants]

Only three of the four participants who are part of the team have the opportunity to increase their final payoffs in the team project stage. Two of the four participants (Participant A and Participant B) are guaranteed to be part of the team. The participant who is not part of the team receives no payoffs from this part of the experiment.

You are participant A [B; C or D].

**The third team member and the participant who will not be part of the team will be selected from the two remaining participants in the following way:**

- The computer will randomly select either Candidate C or Candidate D as the third team member. Participant C and Participant D have equal chances of becoming the third team member.
- Team member B and Participant C are friends. Team member B and Participant C came to the lab together today.
- Team member B and Participant D are not friends. Team member B and Participant D do not know each other.

Participant A can alter the decision of the computer and actively select one of the two participants (Participant C or Participant D). If Participant A chooses this option, he or she has to pay a fee of between 1 and 45 Talers.

**All participants will receive the following information**

We will tell all participants about who is going to be part of the team and whether Participant A or the computer has selected the third team member. Only Participant A will be told how much he or she has to pay in order to have the opportunity to select a team member

**Comprehension Test**[all participants]

Before the participants make their decision, we would kindly ask you to answer some comprehension questions.

Is Participant A able to influence the decision of the third participant? Can Participant B influence his or her own payment as well as the payments of the other participant?

**Selection Decision Participant A**[only shown to Participant A]

**The third team member and the participant who will not be part of the team will be selected from the two remaining participants in the following way:**

- The computer will randomly select either Candidate C or Candidate D as the third team member. Participant C and Participant D have equal chances of becoming the third team member.
- Team member B and Participant C are friends. Team member B and Participant C came to the lab together today.
- Team member B and Participant D are not friends. Team member B and Participant D do not know each other.

You can alter the decision of the computer and actively select one of the two participants (Participant C or Participant D). If you choose this option, you have to pay a fee that will reduce the final payoffs from this part of the experiment.

In order to do so we will ask you to decide ten times between Option A and Option B.

The computer will randomly select one of the ten lines and will implement the decision, you have chosen in that respective line.

**Remember that every participant in the team receives 100 Talers.**

**All participants will receive the following information**

We will inform all participants about who will be part of the team and whether Participant A or the computer has selected the third team member. Only Participant A will be told how much he or she has to pay in order to have the opportunity to select a team member.

If you want to read the instructions again you can click ***here.***

| **Option A** | **Option B** |
| --- | --- |
| You have the opportunity to select one of the two participants (C or D) to become part of the team.  In order to do so you have to pay **1 Taler.** | The computer will randomly select Participant C or Participant D to be the third team member. |
| You have the opportunity to select one of the two participants (C or D) to become part of the team.  In order to do so you have to pay **5 Talers.** | The computer will randomly select Participant C or Participant D to be the third team member. |
| You have the opportunity to select one of the two participants (C or D) to become part of the team.  In order to do so you have to pay **10 Talers.** | The computer will randomly select Participant C or Participant D to be the third team member. |
| You have the opportunity to select one of the two participants (C or D) to become part of the team.  In order to do so you have to pay **15 Talers.** | The computer will randomly select Participant C or Participant D to be the third team member. |
| You have the opportunity to select one of the two participants (C or D) to become part of the team.  In order to do so you have to pay **20 Talers.** | The computer will randomly select Participant C or Participant D to be the third team member. |
| You have the opportunity to select one of the two participants (C or D) to become part of the team.  In order to do so you have to pay **25 Talers.** | The computer will randomly select Participant C or Participant D to be the third team member. |
| You have the opportunity to select one of the two participants (C or D) to become part of the team.  In order to do so you have to pay **30 Talers.** | The computer will randomly select Participant C or Participant D to be the third team member. |
| You have the opportunity to select one of the two participants (C or D) to become part of the team.  In order to do so you have to pay **35 Talers.** | The computer will randomly select Participant C or Participant D to be the third team member. |
| You have the opportunity to select one of the two participants (C or D) to become part of the team.  In order to do so you have to pay 40 **Talers.** | The computer will randomly select Participant C or Participant D to be the third team member. |
| You have the opportunity to select one of the two participants (C or D) to become part of the team.  In order to do so you have to **pay 45 Talers.** | The computer will randomly select Participant C or Participant D to be the third team member. |

**Random Selection (RS) Treatment**

[all participants]

This part of the experiment consists of two stages; the team formation stage and the project stage in which the final payoffs from this part of the experiments are determined. In the team formation phase three of the four team members are going to build a team. Participant A and Participant B are already part of the team. One further participant (either C or D) will be selected as the third team member at the team formation stage.

You are Participant A [B; C or D].

The three team members will later have the opportunity to increase their payoffs. The fourth participant, who is not part of the team, will get no additional payoff from this part of the experiment. We are first going to explain in detail how the team members are selected: we like to explain how the payoffs are determined in this part of the experiment.

**Instructions Project Stage**

[all participants]

**At the beg**inning of the project stage, each team member will receive an endowment of 100 Talers. The way in which this endowment can be used depends on your role.

Participant A and the third yet-to-be-determined team member (Participant C or D) are passive. They cannot decide on their own how to use the endowment.

Only Participant B can freely decide how to use his/her endowment. His or her task is to decide how to use the endowment. In particular, he or she must decide how many Talers he or she wants to invest in a team project and how many Talers he or she wants to keep for himself/herself. Participant A and the third team member (Participant C or D) are obliged to invest their entire endowment of 100 Talers in the team project.

**The influences of Participant B’s decision on his or her payoffs**

The payoff of Participant B consists of two parts

1. The amount of money that B keeps for himself/herself
2. The payoffs, he/she receives as a return on his/her investment in the team project.

**The amount of money he/she receives from the Team project is calculated as follows (calculations are not only valid for Participant B, but for all team members):**

All investments of the three team members will be doubled by the laboratory.
The doubled investments will be shared equally among the team members:

Payoffs from the team project = 1/3 x 2 x the sum of all the investments of all the team members

**How the payoffs of Participant A and the third team member (Participant C or D) are determined**

Participant A and the third team member (either Participant C or D) only receive payoffs from the team project, because they are obliged to invest their whole endowment in the team project.

Payoffs from the team project = 1/3 x 2 x the sum of all the investments of all the team members

**Using the slider below you can try to see how changes in the investment decision of B changes the payoffs of all the team members.**

**Team Formation Stage Instructions**

[all participants]

Only three of the four participants who are part of the team have the opportunity to increase their final payoffs in the team project stage. Two of the four participants (Participant A and Participant B) are guaranteed to be part of the team. The participant who is not part of the team receives no payoffs from this part of the experiment.

You are Participant A [B; C or D].

**The third team member and the participant who will not be part of the team will be selected from the two remaining participants in the following way:**

- The computer randomly selects either Candidate C or Candidate D as the third team member. Participant C and Participant D have equal chances of becoming the third team member.
- Team member B and Participant C are friends. Team member B and Participant C came to the lab together today.
- Team member B and Participant D are not friends. Team member B and Participant D do not know each other.

**Comprehension Test**

Before the participants make their decision, we kindly ask you to answer two comprehension questions.

Is Participant A able to influence the decision of the third participant?

Can Participant B influence his or her own payment as well as the other payments?

**Team Project Stage**

[only displayed to Participant B]

We will tell you the identity of the third team member selected at the end of today’s experiment. We kindly ask you to make two decisions:

- First, you will make an investment decision if the chosen team member is your friend.
- Second, you will make an investment decision if you do not know the third team member.

How much would you like to invest in the common team project if the chosen team member is your friend?

How much would you like to invest in the common team project if you do not know the third team member?

If you want, you may use the slider below to see how your investment decision will affect the payoffs of all the team members.

**Your guess regarding the decisions of other participants**

[only displayed to Participant A]

Lastly, we ask you to make a guess as to how much the B participants invested, on average, in the team project. For every answer that is not more than 3 Talers more or less than the true value, you will receive 50 Talers.

How many Talers did Participant B invest, on average, if the chosen participant is his/ her friend (Participant C)?

How many Talers did Participant B invest, on average, if the chosen participant is unknown to him/her (Participant D)?

**Transparent Strategic Selection (SS) Treatment**

[all participants]

This part of the experiment consists of two stages; the team formation stage and the project stage in which the final payoffs from this part of the experiments are determined. In the team formation phase three of the four team members are going to build a team. Participant A and Participant B are already part of the team. One further participant (either C or D) will be selected as the third team member in the team formation stage.

You are Participant A [B; C or D].

The three team members will later have the opportunity to increase their payoffs. The fourth participant, who is not part of the team, will get no additional payoff from this part of the experiment. Before, we are going to explain in detail how the team members are selected; we want to explain how the payoffs are determined in this part of the experiment.

**Project Stage Instructions**

[all participants]

**At the beg**inning of the project stage, each team member receives an endowment of 100 Talers. The way in which this endowment can be used depends on your role.

Participant A and the third yet-to-be-determined team member (Participant C or D) are passive. They cannot decide how to use the endowment on their own.

Only Participant B can freely decide how to use his/her endowment. His or her task is to decide how to use the endowment. In particular, he or she will decide how many Talers he or she wants to invest in a team project and how many Talers he or she wants to keep for himself/herself. Participant A and the third team member (Participant C or D) are obliged to invest their entire endowment of 100 Talers in the team project.

**The influences of Participant B’s decision on his or her payoffs**

The payoff of Participant B consists of two parts

1. The amount of money that B keeps for himself/herself
2. The payoffs he/she receives as a return on his/her investment in the team project.

**The amount of money he/she receives from the team project is calculated as follows (calculations are not only valid for Participant B, but for all team members):**

All the investments of the three team members will be doubled by the laboratory.
The doubled investments will be shared equally among the team members:

Payoffs from the team project = 1/3 x 2 x the sum of all the investments of all the team members

**How the payoffs of Participant A and the third team member (Participant C or D) are determined**

Participant A and the third team member (either Participant C or D) only receive payoffs from the team project because they are obliged to invest their whole endowment in the team project.

Payoffs from the team project = 1/3 x 2 x the sum of all the investments of all the team members

**Using the slider below you can try to see how changes in the investment decision of B change the payoffs of all team members.**

**Team Formation Stage Instructions**

[all participants]

Only three of the four participants who are part of the team have the opportunity to increase their final payoffs in the team project stage. Two of the four participants (Participant A and Participant B) are guaranteed to be part of the team. The participant who is not part of the team receives no payoffs from this part of the experiment.

You are Participant A [B, C, D]

**The third team member and the participant who will not be part of the team will be selected from the two remaining participants in the following way:**

- The computer randomly selects either Candidate C or Candidate D as the third team member. Participant C and Participant D have equal chances to become the third team member.
- Team member B and Participant C are friends. Team member B and Participant C came to the lab together today.
- Team member B and Participant D are not friends. Team member B and Participant D do not know each other.

Participant A can alter the decision of the computer and actively select one of the two participants (Participant C or Participant D. If Participant A chooses this option, he or she has to pay a fee of between 1 and 45 Talers.

**All participants will receive the following information**

We will tell all participants who will be part of the team and whether Participant A or the computer has selected the third team member. Only Participant A will be told how much he or she has to pay in order to have the opportunity to select one team member.

**Comprehension Test**[all participants]

Before the participants make their decision, we kindly ask you to answer two comprehension questions?

Is Participant A able to influence the decision of the third participant?
Can Participant B influence his or her own payment as well as the payments of the other participant?

**Remember that player B can affect the outcome of all team members with his/her decision.**

**Selection Decision**[only displayed to Participant A]

**The third team member and the participant who will not be part of the team will be selected from the two remaining participants in the following way:**

- The computer randomly selects either Candidate C or Candidate D as the third team member. Participant C and Participant D have equal chances of becoming the third team member.
- Team member B and Participant C are friends. Team member B and Participant C came to the lab together today.
- Team member B and Participant D are not friends. Team member B and Participant D do not know each other.

You can alter the decision of the computer and actively select one of the two participants (Participant C or Participant D). If you choose this option, you have to pay a fee that reduces the final payoffs of this part of the experiment.

In order to do so we ask you to decide ten times between Option A and Option B.

The computer will randomly select one of the ten lines and will implement the decision you have chosen in the respective line.

**Remember that every participant in the team receives 100 Talers.**

**All participants will receive the following information**

We will inform all participants as to who will be part of the team and whether Participant A or the computer has selected the third team member. Only Participant A will be told how much he or she has to pay in order to have the opportunity to select one team member.

If you want to read the instructions again you can click ***here.***

| **Option A** | **Option B** |
| --- | --- |
| You have the opportunity to select one of the two participants (C or D) to become part of the team. In order to do so you have to pay **1 Taler.** | The computer will randomly select Participant C or Participant D to be the third team member. |
| You have the opportunity to select one of the two participants (C or D) to become part of the team. In order to do so you have to pay **5 Talers.** | The computer will randomly select Participant C or Participant D to be the third team member. |
| You have the opportunity to select one of the two participants (C or D) to become part of the team. In order to do so you have to pay **10 Talers.** | The computer will randomly select Participant C or Participant D to be the third team member. |
| You have the opportunity to select one of the two participants (C or D) to become part of the team. In order to do so you have to pay **15 Talers.** | The computer will randomly select Participant C or Participant D to be the third team member. |
| You have the opportunity to select one of the two participants (C or D) to become part of the team. In order to do so you have to pay **20 Talers.** | The computer will randomly select Participant C or Participant D to be the third team member. |
| You have the opportunity to select one of the two participants (C or D) to become part of the team. In order to do so you have to pay **25 Talers.** | The computer will randomly select Participant C or Participant D to be the third team member. |
| You have the opportunity to select one of the two participants (C or D) to become part of the team. In order to do so you have to pay **30 Talers.** | The computer will randomly select Participant C or Participant D to be the third team member. |
| You have the opportunity to select one of the two participants (C or D) to become part of the team. In order to do so you have to pay **35 Talers.** | The computer will randomly select Participant C or Participant D to be the third team member. |
| You have the opportunity to select one of the two participants (C or D) to become part of the team. In order to do so you have to pay 40 **Talers.** | The computer will randomly select Participant C or Participant D to be the third team member. |
| You have the opportunity to select one of the two participants (C or D) to become part of the team. In order to do so you have to **pay 45 Talers.** | The computer will randomly select Participant C or Participant D to be the third team member. |

**Team Project Stage**

[only displayed to Participant B]

We will tell you the identity of the third team member selected at the end of today’s experiment. We kindly ask you to make two decisions:

- First, you will make an investment decision if the chosen team member is your friend.
- Second, you will make an investment decision if you do not know the third team member.

Please note that depending on the decision of Participant A either he/she or the computer selected the third team member:

Participant A [the computer] has selected the third team member.

How much would you like to invest in the common team project if the chosen team member is your friend?

How much would you like to invest in the common team project if you do not know the third team member?

If you want, you may use the slider below to try to see how your investment decision affects the payoffs of all team members.

**Your guess regarding the decisions of other participants**

[only displayed to Participant A]

Lastly, we ask you to make a guess as to how much B participants invested on average in the team project. For every answer that is no more than 3 Talers more or less than the true value, you will receive 50 Talers.

How many Talers did Participant B invest, on average, if the chosen participant is his/ her friend (Participant C) and Participant A made the selection decision?

How many Talers did Participant B invest, on average, if the chosen participant is unknown to him/her (Participant D) and Participant A made the selection decision?

How many Talers did Participant B invest, on average, if the chosen participant is his/ her friend (Participant C) and the computer made the selection decision?

How many Talers did Participant B invest, on average, if the chosen participant is unknown to him/her (Participant D) and the computer made the selection decision?

**Opaque Strategic Selection (SS) Treatment**

[all participants]

This part of the experiment consists of two stages; the team formation stage and the project stage, in which the final payoffs from this part of the experiments are determined. In the team formation phase three of the four team members are going to build a team. Participant A and Participant B are already part of the team. One further participant (either C or D) will be selected as the third team member in the team formation stage.

You are Participant A [B; C or D].

The three team members will later have the opportunity to increase their payoffs. The fourth participant, who is not part of the team, will get no additional payoff from this part of the experiment. Initially, we are going to explain in detail how the team members are selected. We explain how the payoffs are determined in this part of the experiment.

**Project Stage Instruction**

[all participants]

**At the beg**inning of the project stage each team member receives an endowment of 100 Talers. The way in which this endowment can be used depends on your role.

Participant A and the third yet-to-be-determined team member (Participant C or D) are passive. They cannot decide how to use the endowment on their own.

Only Participant B can freely decide how to use his/her endowment. His or her task is to decide how to use the endowment. In particular, he or she must decide how many Talers he or she wants to invest in a team project and how many Talers he or she wants to keep for himself/herself. Participant A and the third team member (Participant C or D) are obliged to invest their entire endowment of 100 Talers in the team project.

**The influences of Participant B’s decision on his or her payoffs**

The payoff of Participant B consists of two parts

1. The amount of money that B keeps for himself/herself
2. The payoffs, he/she receives as a return on his/her investment in the team project.

**The amount of money he/she receives from the team project is calculated as follows (calculations are valid not only for Participant B, but for all team members):**

All the investments of the three team members will be doubled by the laboratory.

The doubled investments will be shared equally among the team members:

Payoffs from the team project = 1/3 x 2 x the sum of all the investments of all the team members

**How the payoffs of Participant A and the third team member (Participant C or D) are determined**

Participant A and the third team member (either Participant C or D) only receive payoffs from the team project because they are obliged to invest their whole endowment in the team project.

Payoffs from the team project = 1/3 x 2 x the sum of all the investments of all the team members

**Using the slider below you can try to see how changes in the investment decision of B change the payoffs of all team members.**

**Team Formation Stage Instructions**

[all participants]

Only three of the four participants who are part of the team have the opportunity to increase their final payoffs in the team project stage. Two of the four participants (Participant A and Participant B) are guaranteed to be part of the team. The participant who is not part of the team receives no payoffs from this part of the experiment.

You are Participant A [B, C, D].

**The third team member and the participant who will not be part of the team will be selected from the two remaining participants in the following way:**

- The computer randomly selects either Candidate C or Candidate D as the third team member. Participant C and Participant D have equal chances of becoming the third team member.
- Team member B and Participant C are friends. Team member B and Participant C came to the lab together today .
- Team member B and Participant D are not friends. Team member B and Participant D do not know each other.

Participant A can alter the decision of the computer and actively select one of the two participants (Participant C or Participant D. If Participant A chooses this option, he or she has to pay a fee of between 1 and 45 Talers.

**All participants will receive the following information**

We will tell all participants who will be part of the team**. We will not inform participants as to whether Participant A or the computer has selected the third team member.** Only Participant A will be told how much he or she has to pay in order to have the opportunity to select one team member.

**Comprehension Test**[all participants]

Before the participants make their decision, we would kindly ask you to answer two comprehension questions.

Is Participant A able to influence the decision of the third participant?
Can Participant B influence his or her own payment as well as the payments of the other participants?

**Selection Decision**[only displayed to participant A]

**The third team member and the participant who will not be part of the team will be selected from the two remaining participants in the following way:**

- The computer randomly selects either Candidate C or Candidate D as the third team member. Participant C and Participant D have equal chances of becoming the third team member.
- Team member B and Participant C are friends. Team member B and Participant C came to the lab together today.
- Team member B and Participant D are not friends. Team member B and Participant D do not know each other.

You can alter the decision of the computer and actively select one of the two participants (Participant C or Participant D). If you choose this option, you have to pay a fee that will reduce the final payoffs of this part of the experiment.

In order to do so we ask you to decide ten times between Option A and Option B.

The computer will randomly select one out of the ten lines and will implement the decision you have chosen in the respective line.

**Remember that every participant in the team receives 100 Talers.**

**All participants will receive the following information**

We will tell all the participants who will be part of the team**. We will not tell participants whether Participant A or the computer has selected the third team member.** Only Participant A will be told how much he or she has to pay in order to have the opportunity to select one team member.

If you want to read the instructions again you can click ***here.***

**Remember that player B can affect the outcome for all team members with his/her decision.**

| **Option A** | **Option B** |
| --- | --- |
| You have the opportunity to select one of the two participants (C or D) to become part of the team.  In order to do so you have to pay **1 Taler.** | The computer will randomly select Participant C or Participant D to be the third team member. |
| You have the opportunity to select one of the two participants (C or D) to become part of the team.  In order to do so you have to pay **5 Talers.** | The computer will randomly select Participant C or Participant D to be the third team member. |
| You have the opportunity to select one of the two participants (C or D) to become part of the team.  In order to do so you have to pay **10 Talers.** | The computer will randomly select Participant C or Participant D to be the third team member. |
| You have the opportunity to select one of the two participants (C or D) to become part of the team.  In order to do so you have to pay **15 Talers.** | The computer will randomly select Participant C or Participant D to be the third team member. |
| You have the opportunity to select one of the two participants (C or D) to become part of the team.  In order to do so you have to pay **20 Talers.** | The computer will randomly select Participant C or Participant D to be the third team member. |
| You have the opportunity to select one of the two participants (C or D) to become part of the team.  In order to do so you have to pay **25 Talers.** | The computer will randomly select Participant C or Participant D to be the third team member. |
| You have the opportunity to select one of the two participants (C or D) to become part of the team.  In order to do so you have to pay **30 Talers.** | The computer will randomly select Participant C or Participant D to be the third team member. |
| You have the opportunity to select one of the two participants (C or D) to become part of the team.  In order to do so you have to pay **35 Talers.** | The computer will randomly select Participant C or Participant D to be the third team member. |
| You have the opportunity to select one of the two participants (C or D) to become part of the team.  In order to do so you have to pay 40 **Talers.** | The computer will randomly select Participant C or Participant D to be the third team member. |
| You have the opportunity to select one of the two participants (C or D) to become part of the team.  In order to do so you have to **pay 45 Talers.** | The computer will randomly select Participant C or Participant D to be the third team member. |

**Team Project Stage**[only displayed to participant B]

We will tell you the identity of the third team member selected at the end of today’s experiment. We would kindly ask you to make two decisions:

- First, you will make an investment decision if the chosen team member is your friend.
- Second, you will make an investment decision if you do not know the third team member.

Please note that depending on the decision of Participant A either he/she or the computer selected the third team member:

Participant A [the computer] has selected the third team member.

How much would you like to invest in the common team project if the chosen team member is your friend?

How much would you like to invest in the common team project if you do not know the third team member?

If you want, you may use the slider below to try to see how your investment decision affects the payoffs of all team members.

**Your guess regarding the decisions of the other participants**

[only displayed to participant A]

Lastly, we ask you to make a guess as to how much B participants invested, on average, in the team project. For every answer that is no more than 3 Talers more or less than the true value, you will receive 50 Talers.

How many Talers did Participant B invest, on average, if the chosen participant is his/ her friend (Participant C) and Participant A made the selection decision?

How many Talers did Participant B invest, on average, if the chosen participant is unknown to him/her (Participant D) and Participant A made the selection decision?

How many Talers did Participant B invest, on average, if the chosen participant is his/ her friend (Participant C) and the computer made the selection decision?

How many Talers did Participant B invest, on average, if the chosen participant is unknown to him/her (Participant D) and the computer made the selection decision?

**Questionnaire – Demographic Questions**[all participants]

**Global Preference Survey**

Finally, we ask you to answer some questions regarding yourself.

1. Imagine the following situation: you have won €1000 in a lottery. Considering your current situation, how much would you donate to charity? (amounts between 0 and 1000 are allowed)
2. How do you assess your willingness to share with others without expecting anything in return when it comes to charity? Please use a scale from 0 to 10, where 0 means you are “completely unwilling to share” and 10 means you are “completely willing to share”.
3. Imagine the following situation: you are shopping in an unfamiliar city and realize you have lost your way. You ask a stranger for directions. The stranger offers to take you in their car to your destination. The ride takes about 20 minutes and costs the stranger about €20. The stranger does not want any money for it. You are carrying six bottles of wine. The cheapest bottle costs €5, the most expensive one €30. You decide to give one of the bottles to the stranger as a thank-you gift. Which bottle do you give him/her?

   Respondents can choose from the following options: The bottle worth €5, 10, 15, 20, 25, or 30.
4. How do you see yourself? Are you a person who is generally willing to punish unfair behavior even if this is costly? Please use a scale from 0 to 10, where 0 means you are “not willing to incur any costs at all to punish unfair behavior” and a 10 means you are “very willing to incur costs to punish unfair behavior”. You can also use in-between amounts to indicate where you come on the scale.
5. Please tell us, in general, how willing or unwilling you are to take risks. Please use a scale from 0 to 10, where 0 means you are “completely unwilling to take risks” and a 10 means you are “very willing to take risks”. You can also use any number between 0 and 10 to indicate where you come on the scale.

**Social Value Orientation Task**

We ask you to make the following six hypothetical decisions that will not be implemented.

You receive 85 c c c c c c c c c 85
Other receives 50 c c c c c c c c c 15

You receive 85 c c c c c c c c c 100
Other receives 50 c c c c c c c c c 50

You receive 50 c c c c c c c c c 85
Other receives 100 c c c c c c c c c 85

You receive 50 c c c c c c c c c 85
Other receives 100 c c c c c c c c c 15

You receive 100 c c c c c c c c c 50
Other receives 50 c c c c c c c c c 100

You receive 100 c c c c c c c c c 85
Other receives 50 c c c c c c c c c 85

**Risk Task**
Please imagine the following situation: You can choose between a certain payment and a lottery. The lottery gives you a 50 percent chance of receiving €300, and an equally high chance of receiving nothing. Now imagine you have to choose between the lottery and a certain sure payment. We will present you with five different situations. The lottery is the same in all the situations. The certain payment is different in every situation.

1. Which would you prefer: a 50 percent chance of winning 300 Euro when at the same time there is 50 percent chance of winning nothing, or would you rather have the amount of 160 Euro as a sure payment?

(a) lottery → go to question 17
(b) sure payment → go to question 2

1. What would you prefer: a 50 percent chance of winning 300 Euro when at the same time there is 50 percent chance of winning nothing, or would you rather have the amount of 80 Euro as a sure payment?

(a) lottery → go to question 10
(b) sure payment → go to question 3

1. What would you prefer: a 50 percent chance of winning 300 Euro when at the same time there is 50 percent chance of winning nothing, or would you rather have the amount of 40 Euro as a sure payment?

(a) lottery → go to question 4
(b) sure payment → go to question 7

1. What would you prefer: a 50 percent chance of winning 300 Euro when at the same time there is 50 percent chance of winning nothing, or would you rather have the amount of 60 Euro as a sure payment?

(a) lottery → go to question 5
(b) sure payment → go to question 6

1. What would you prefer: a 50 percent chance of winning 300 Euro when at the same time there is 50 percent chance of winning nothing, or would you rather have the amount of 70 Euro as a sure payment?

(a) lottery
(b) sure payment

1. What would you prefer: a 50 percent chance of winning 300 Euro when at the same time there is 50 percent chance of winning nothing, or would you rather have the amount of 50 Euro as a sure payment?

(a) lottery
(b) sure payment

1. What would you prefer: a 50 percent chance of winning 300 Euro when at the same time there is 50 percent chance of winning nothing, or would you rather have the amount of 20 Euro as a sure payment?

(a) lottery → go to question 8
(b) sure payment → go to question 9

1. What would you prefer: a 50 percent chance of winning 300 Euro when at the same time there is 50 percent chance of winning nothing, or would you rather have the amount of 30 Euro as a sure payment?

(a) lottery
(b) sure payment

1. What would you prefer: a 50 percent chance of winning 300 Euro when at the same time there is 50 percent chance of winning nothing, or would you rather have the amount of 10 Euro as a sure payment?

(a) lottery
(b) sure payment

1. What would you prefer: a 50 percent chance of winning 300 Euro when at the same time there is 50 percent chance of winning nothing, or would you rather have the amount of 120 Euro as a sure payment?

(a) lottery → go to question 14
(b) sure payment → go to question 11

1. What would you prefer: a 50 percent chance of winning 300 Euro when at the same time there is 50 percent chance of winning nothing, or would you rather have the amount of 100 Euro as a sure payment?

(a) lottery → go to question 13
(b) sure payment → go to question 12

1. What would you prefer: a 50 percent chance of winning 300 Euro when at the same time there is 50 percent chance of winning nothing, or would you rather have the amount of 90 Euro as a sure payment?

(a) lottery
(b) sure payment

1. What would you prefer: a 50 percent chance of winning 300 Euro when at the same time there is 50 percent chance of winning nothing, or would you rather have the amount of 110 Euro as a sure payment?

(a) lottery
(b) sure payment

1. What would you prefer: a 50 percent chance of winning 300 Euro when at the same time there is 50 percent chance of winning nothing, or would you rather have the amount of 140 Euro as a sure payment?

(a) lottery → go to question 15
(b) sure payment → go to question 16

1. What would you prefer: a 50 percent chance of winning 300 Euro when at the same time there is 50 percent chance of winning nothing, or would you rather have the amount of 150 Euro as a sure payment?

(a) lottery
(b) sure payment

1. What would you prefer: a 50 percent chance of winning 300 Euro when at the same time there is 50 percent chance of winning nothing, or would you rather have the amount of 130 Euro as a sure payment?

(a) lottery
(b) sure payment

1. What would you prefer: a 50 percent chance of winning 300 Euro when at the same time there is 50 percent chance of winning nothing, or would you rather have the amount of 240 Euro as a sure payment?

(a) lottery → go to question 25
(b) sure payment → go to question 18

1. What would you prefer: a 50 percent chance of winning 300 Euro when at the same time there is 50 percent chance of winning nothing, or would you rather have the amount of 200 Euro as a sure payment?

(a) lottery → go to question 22
(b) sure payment → go to question 19

1. What would you prefer: a 50 percent chance of winning 300 Euro when at the same time there is 50 percent chance of winning nothing, or would you rather have the amount of 180 Euro as a sure payment?

(a) lottery → go to question 20
(b) sure payment → go to question 21

1. What would you prefer: a 50 percent chance of winning 300 Euro when at the same time there is 50 percent chance of winning nothing, or would you rather have the amount of 190 Euro as a sure payment?

(a) lottery
(b) sure payment

1. What would you prefer: a 50 percent chance of winning 300 Euro when at the same time there is 50 percent chance of winning nothing, or would you rather have the amount of 170 Euro as a sure payment?

(a) lottery
(b) sure payment

1. What would you prefer: a 50 percent chance of winning 300 Euro when at the same time there is 50 percent chance of winning nothing, or would you rather have the amount of 220 Euro as a sure payment?

(a) lottery → go to question 23
(b) sure payment → go to question 24

1. What would you prefer: a 50 percent chance of winning 300 Euro when at the same time there is 50 percent chance of winning nothing, or would you rather have the amount of 230 Euro as a sure payment?

(a) lottery
(b) sure payment

1. What would you prefer: a 50 percent chance of winning 300 Euro when at the same time there is 50 percent chance of winning nothing, or would you rather have the amount of 210 Euro as a sure payment?

(a) lottery
(b) sure payment

1. What would you prefer: a 50 percent chance of winning 300 Euro when at the same time there is 50 percent chance of winning nothing, or would you rather have the amount of 280 Euro as a sure payment?

(a) lottery → go to question 29
(b) sure payment → go to question 26

1. What would you prefer: a 50 percent chance of winning 300 Euro when at the same time there is 50 percent chance of winning nothing, or would you rather have the amount of 260 Euro as a sure payment?

(a) lottery → go to question 27
(b) sure payment → go to question 28

1. What would you prefer: a 50 percent chance of winning 300 Euro when at the same time there is 50 percent chance of winning nothing, or would you rather have the amount of 270 Euro as a sure payment?

(a) lottery
(b) sure payment

1. What would you prefer: a 50 percent chance of winning 300 Euro when at the same time there is 50 percent chance of winning nothing, or would you rather have the amount of 250 Euro as a sure payment?

(a) lottery
(b) sure payment

1. What would you prefer: a 50 percent chance of winning 300 Euro when at the same time there is 50 percent chance of winning nothing, or would you rather have the amount of 300 Euro as a sure payment?

(a) lottery → go to question 31
(b) sure payment → go to question 30

1. What would you prefer: a 50 percent chance of winning 300 Euro when at the same time there is 50 percent chance of winning nothing, or would you rather have the amount of 290 Euro as a sure payment?

(a) lottery
(b) sure payment

1. What would you prefer: a 50 percent chance of winning 300 Euro when at the same time there is 50 percent chance of winning nothing, or would you rather have the amount of 310 Euro as a sure payment?

(a) lottery
(b) sure payment

**Demographic Questions**

How old are you?
What is your gender?

What is the highest level of education you have achieved?

What is/was your subject of study?
Would you like to tell us something about this study?
